# Supplementary material for: Publication trends of research on uveal melanoma during 2000–2020: a 20-year bibliometric study
Source: PubMed Central journal article supplement — Ann Transl Med. 2020 Nov;8(21):1463. doi: 10.21037/atm-20-3700 (PMC7723529; doi:10.21037/atm-20-3700), 2020-11
Supplement: atm-08-21-1463-supplementary.pdf [file atm-08-21-1463-supplementary.pdf]

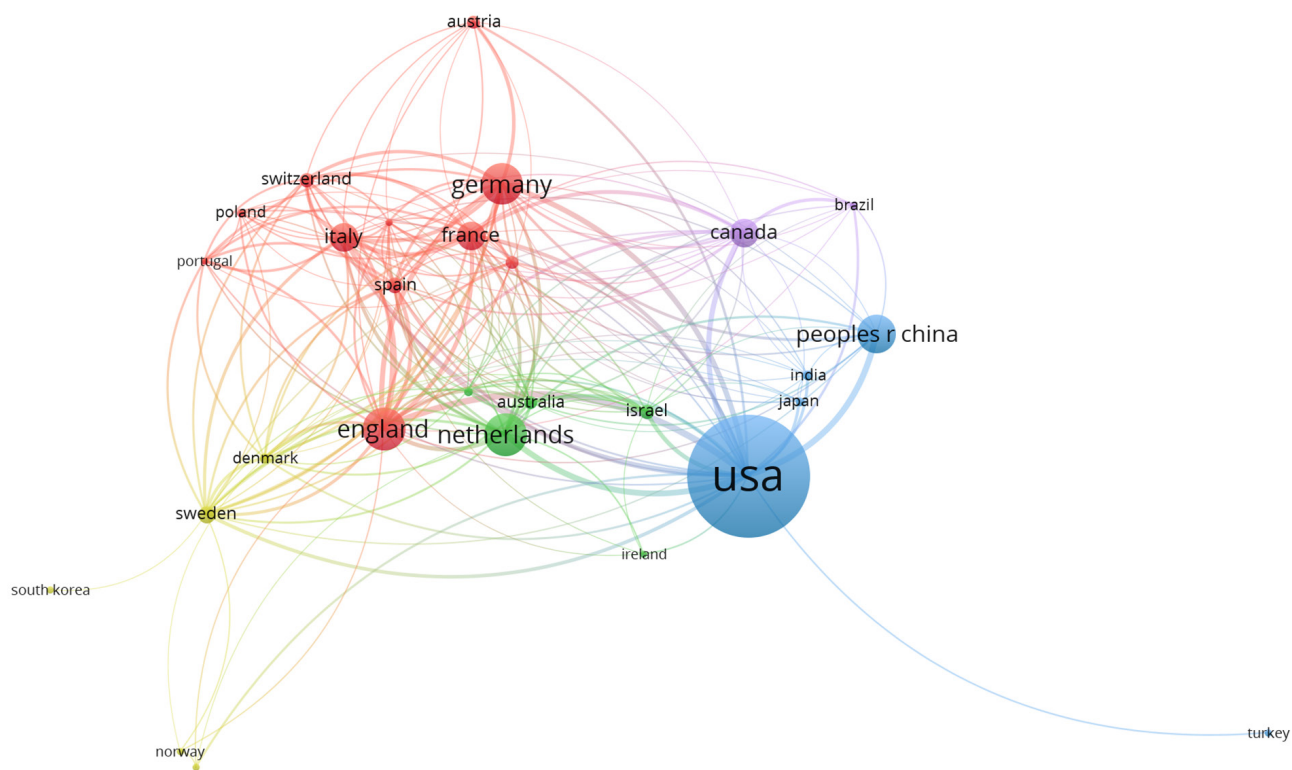

Figure S1 Co-occurrence relations graph of countries and regions.

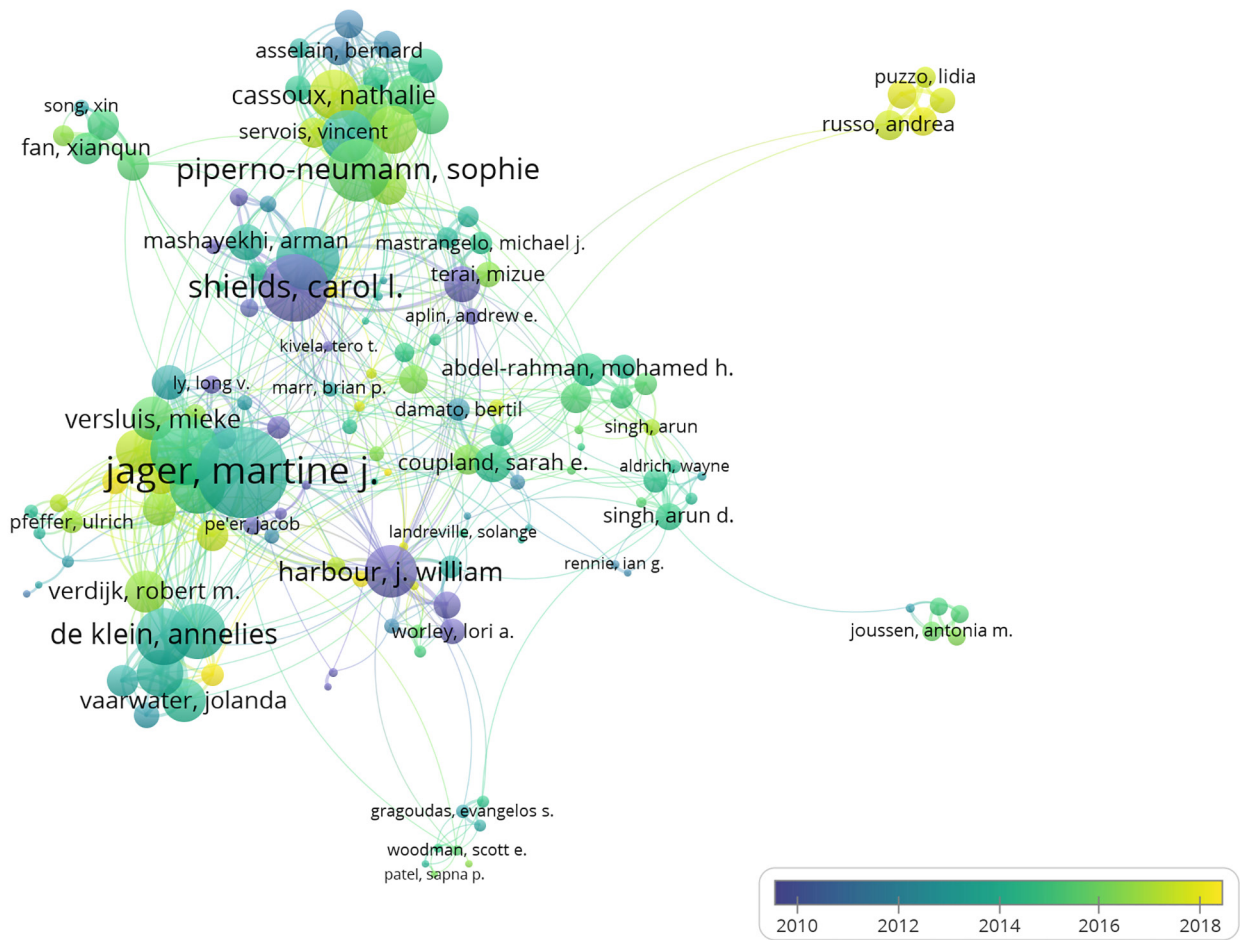

**Figure S2** Co-authorship collaboration network by researchers from papers published from 2000 to 2020.
